1 **Towards a probiotic approach for building plumbing – nutrient-based selection**  
2 **during initial biofilm formation on flexible polymeric materials**

3

4 Neu Lisa<sup>1,2</sup>, Cossu Laura<sup>1,2,3</sup>, Frederik Hammes<sup>1\*</sup>

5

6 <sup>1</sup> Department of Environmental Microbiology, Eawag–Swiss Federal Institute for  
7 Aquatic Science and Technology, Dübendorf, Switzerland

8 <sup>2</sup> Department of Environmental Systems Science, Institute of Biogeochemistry and  
9 Pollutant Dynamics, ETH Zürich, Zürich, Switzerland

10 <sup>3</sup> Infrastructure and Environment, School of Engineering, University of Glasgow,  
11 United Kingdom

12

13

14

15

16

17

18

19

20 \* Corresponding author:

21 **Name:** Frederik Hammes

22 **Tel.:** +41 58 765 5372

23 **Fax.:** +41 58 765 5802

24 **Email:** frederik.hammes@eawag.ch

25 **Abstract**

26

27 Upon entering building plumbing systems, drinking water bacteria experience  
28 considerable changes in environmental conditions. For example, some flexible  
29 polymeric materials leach organic carbon, which increases bacterial growth and  
30 reduces diversity. Here we show that the carbon supply by a flexible polymeric material  
31 drives nutrient-based selection within establishing biofilm communities. We found that  
32 migrating carbon from EPDM coupons resulted in considerable growth for different  
33 drinking water communities ( $0.2 - 3.3 \times 10^8$  cells/cm<sup>2</sup>). All established biofilm  
34 communities showed low diversity (29 – 50 taxa/biofilm), with communities dominated  
35 by even viewer taxa (e.g., 5 taxa accounting for  $94 \pm 5$  % relative abundance, n = 15).  
36 Interestingly, biofilm communities shared some taxa (e.g., *Methylobacterium* spp.) and  
37 families (e.g., Comamonadaceae), despite the difference in starting communities.  
38 Moreover, selected biofilm communities performed better than their original  
39 communities regarding maximum attachment ( $91 \pm 5$  vs.  $69 \pm 23$  %, n = 15) and  
40 attachment rate ( $5.0 \pm 1.7 \times 10^4$  vs.  $2.4 \pm 1.2 \times 10^4$  cells/cm<sup>2</sup>/h, n = 15) when exposed  
41 to new EPDM coupons. Our results demonstrate nutrient-based selection during initial  
42 biofilm formation on a flexible polymeric material and a resulting benefit to selected  
43 communities. We anticipate our findings to help connecting observational  
44 microbiological findings with their underlying ecological principles. Regarding initial  
45 biofilm formation, attachment dynamics, growth, and selection thereof are important  
46 for the management of microbial communities. In fact, managing initial colonization by  
47 supplying specific carbon and/or introducing consciously chosen/designed  
48 communities potentially paves the way for a probiotic approach for building plumbing  
49 materials.

50

## 51 **1. Introduction**

52

53 Uncontrolled microbial growth in building plumbing systems is generally undesirable  
54 as it can lead to operational and/or hygienic problems<sup>1,2</sup>. Such growth is caused by  
55 changes in environmental conditions, which is what drinking water bacteria experience  
56 as soon as they enter a building plumbing system. For example, water temperature  
57 increases and fluctuates spatially and temporally, which was shown to alter community  
58 composition<sup>3,4</sup>. Also, pipe diameters are considerably smaller (e.g., < 2 cm) compared  
59 to main distribution pipes (e.g., ≥ 10 cm), which provides more surface area per water  
60 volume<sup>5</sup>, and increases the impact of biofilms on the water phase. Regarding  
61 operation, flow pattern and rates have been shown to impact biofilm structure and  
62 community composition<sup>6,7</sup>. Finally, diverse materials are used for pipes and non-pipe  
63 components<sup>8</sup>, and some of these support microbial growth by leaching biodegradable  
64 substances<sup>9</sup>, which is especially critical under long stagnation times of the water<sup>10</sup>.  
65 The bottom line is that building plumbing systems often provide more favorable  
66 environmental conditions for bacterial growth than the main distribution network and  
67 that it is important to understand and control not only their individual but also their  
68 combined impact on the drinking water microbiome.

69

70 Several previous studies investigated the impact of building plumbing conditions on its  
71 microbiome. Overall, microbial community compositions tend to change considerably,  
72 e.g., (1) during stagnation<sup>11</sup>, (2) while forming biofilms inside flexible shower hoses<sup>12</sup>,  
73 or (3) due to the combined impact of material, temperature, and stagnation<sup>13</sup>.  
74 Considering one of the above in more detail, studies in our research group that were  
75 addressing biofilm formation on flexible polymeric materials revealed (1) high bacterial

76 numbers (i.e., growth) and (2) a considerable loss in species diversity (i.e.,  
77 selection)<sup>12,14</sup>. Also, Proctor and colleagues<sup>15</sup> observed the development of dissimilar  
78 biofilm community compositions when exposing the same drinking water community  
79 to different polymeric hose materials. Thereupon, they reasoned for considerable  
80 impact of migrating organic carbon on both growth and selection.

81

82 In this study, we investigated nutrient-based selection during initial biofilm formation,  
83 using a microcosm set up for the simulation of new flexible polymeric material (EPDM)  
84 in contact with drinking water. Our hypotheses were: (1) EPDM coupons release  
85 biodegradable organic carbon, which increases the potential of bacteria to grow in an  
86 otherwise carbon-limited environment. (2) Selection occurs within establishing biofilm  
87 communities, irrespective of the initial drinking water community composition. (3) Due  
88 to the common carbon supply, biofilm communities will show a certain degree of  
89 similarity in their compositions. (4) The selection process will bring advantages for  
90 initial biofilm formation, e.g., attachment, growth, etc.. We finally argue that this  
91 information provides an opportunity for the development of new, pro-active  
92 approaches for the management of biofilms that form on polymeric building plumbing  
93 materials.

## 94 **2. Materials and Methods**

95

### 96 **2.1 Selection of coupon material and water**

97 The interplay between one flexible polymeric material and five different drinking waters  
98 was tested regarding biofilm formation and community selection (Figure 1A). Coupons  
99 of ethylene propylene diene monomer (EPDM) rubber (Angst+Pfister AG, Switzerland)  
100 with an ethylene fraction of 2 % (w/w) was used as experimental material throughout  
101 this study. EPDM is approved for the use in contact with drinking water<sup>16,17</sup>, e.g. as  
102 rubber seals within building plumbing systems. Two bottled waters and three non-  
103 chlorinated tap waters were selected as water matrices, namely: Evian (France; *B1*),  
104 Aproz (Switzerland; *B2*), tapped groundwater Dübendorf (Switzerland; *T1*), tap water  
105 Dübendorf (Switzerland; *T2*), and tap water Oerlikon (Switzerland; *T3*). The five waters  
106 differed in their chemical and biological composition. However, all waters were  
107 oligotrophic with low organic carbon and phosphorous concentrations and total  
108 bacterial concentrations in the same order of magnitude ( $1 - 3 \times 10^5$  cells/mL; Table  
109 S1).

110

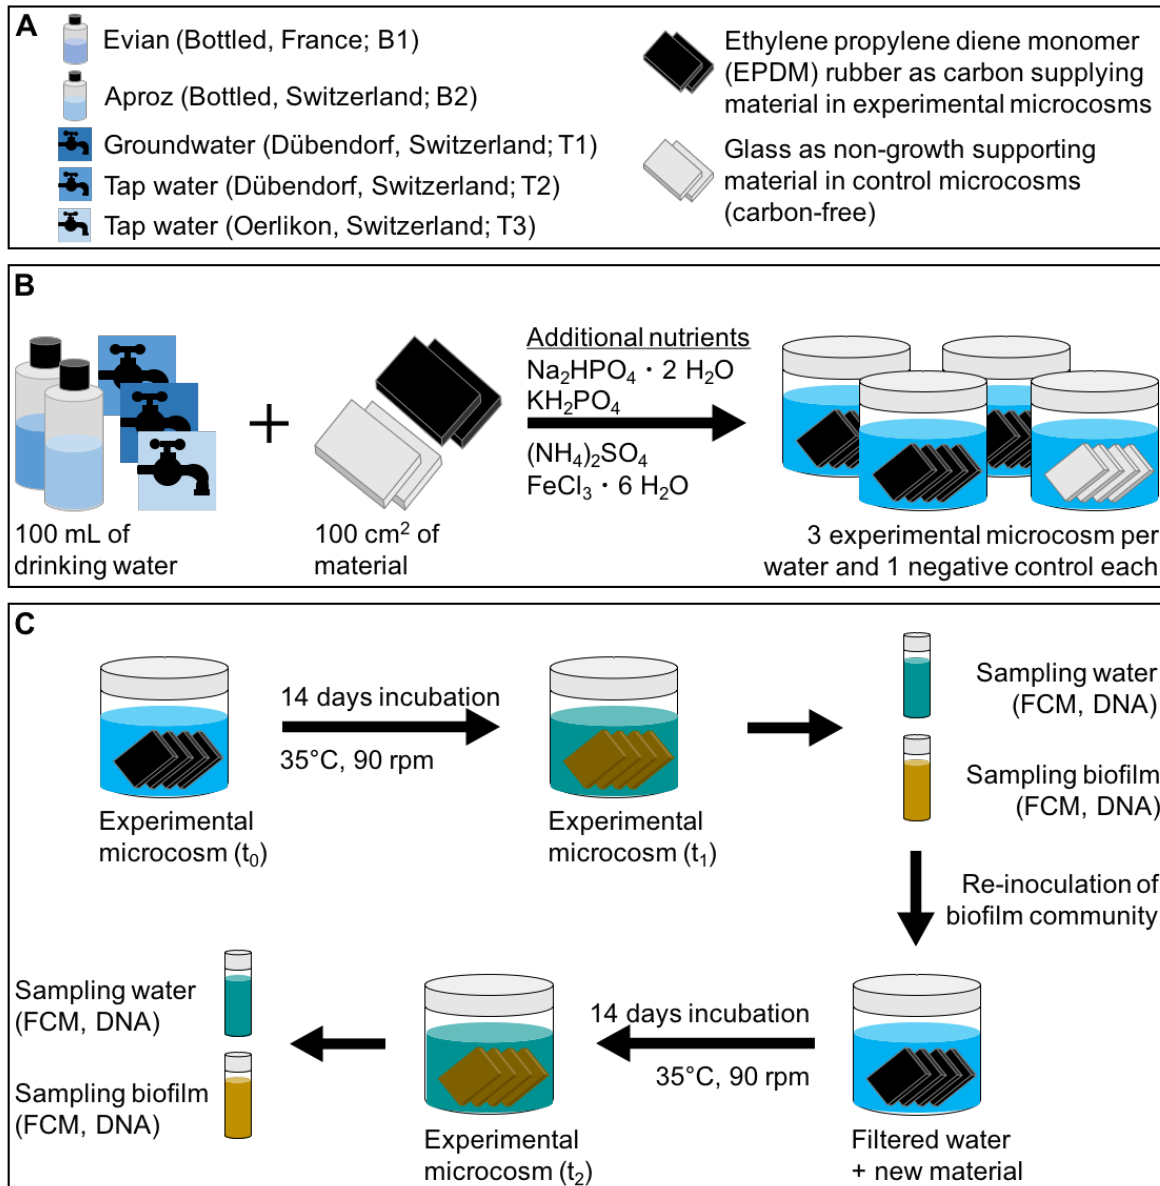

111

112 **Figure 1** Experimental design. (A) Water and coupon materials. (B) Microcosms

113 contained 100 mL water and 100 cm<sup>2</sup> of coupons. To exclude growth limitation,

114 phosphorous, nitrogen, and iron were added to each microcosm. (C) Microcosms were

115 incubated for 14 days (35 °C, 90 rpm). Biofilms and water were analyzed using flow

116 cytometry for total cell concentrations and 16S rRNA gene sequencing for the

117 community compositions ( $t_1$ ). New microcosms were set up using filtered water which

118 was spiked with individual biofilm communities. After another 14 days, biofilms and

119 water phases were again sampled and analyzed ( $t_2$ ).

120

## 121 **2.2 Microcosm design**

122 Microcosms consisted of 240 mL glass jars (74 x 89 mm) with polypropylene lids  
123 including a PTFE lined inlet (Infochroma AG, Zug, Switzerland) (Figure 1). All  
124 glassware was cleaned with 1% (0.33 M) hydrochloric acid (HCl, 32%; Fluka, Sigma-  
125 Aldrich, Buchs, Switzerland), rinsed with nanopure water, and air dried. The clean  
126 glassware was muffled in a furnace (Nabertherm Schweiz AG, Högendorf,  
127 Switzerland) (4.5 h; 500°C). EPDM flat sheets were cut into coupons of 0.2 x 2.6 x 4.3  
128 cm (25 cm<sup>2</sup>). Prior to use, coupons were cleaned with a 0.1% (v/v) sodium hypochlorite  
129 solution (Sigma-Aldrich, Buchs, Switzerland) and rinsed with nanopure water. Glass  
130 was used as the control material. Microscope slides (Menzel-Gläser, 1 mm,  
131 ThermoScientific) were cut to the same coupon size as the EPDM and cleaned  
132 following the same procedure as for the glass jars (above). For each microcosm, four  
133 coupons or slides (i.e., 100 cm<sup>2</sup>) were stacked (Figure 1), separated by stainless steel  
134 springs. The springs and the jar lids were cleaned (60°C, 1 h) in a 100 g/L sodium  
135 persulfate solution (Na<sub>2</sub>S<sub>2</sub>O<sub>8</sub>, Sigma-Aldrich, Buchs, Switzerland), then rinsed with  
136 nanopure water, and air dried. Before use, the bottled drinking water was inverted 3-  
137 4 times for uniform mixing, while cold tap water was flushed for 5 min before filling into  
138 muffled 1 L SCHOTT Duran<sup>®</sup> bottles (SCHOTT AG, Mainz, Germany). Each  
139 microcosm was subsequently filled with 100 mL water. To ensure unlimited growth  
140 conditions, additional nitrogen, phosphorous, and iron were added to the microcosms.  
141 The nitrogen/phosphorous buffer contained sodium phosphate dibasic dehydrate  
142 (Na<sub>2</sub>HPO<sub>4</sub> · 2H<sub>2</sub>O, 1.28 g/L), potassium phosphate monobasic (KH<sub>2</sub>PO<sub>4</sub>, 0.3 g/L), and  
143 ammonium sulfate ((NH<sub>4</sub>)<sub>2</sub>SO<sub>4</sub>, 1.77 g/L) and 3.4 mL of buffer was added to each  
144 microcosm. Iron was supplemented in the form of iron (III) chloride hexahydrate (FeCl<sub>3</sub>

145 • 6 H<sub>2</sub>O, 2.7 g/L), with 50 µL per microcosm. All chemicals were purchased from  
146 Sigma-Aldrich (Buchs, Switzerland).

147

### 148 **2.3 Migration and growth potential assays**

149 For the assessment of carbon migration from the experimental material (EPDM) and  
150 the resulting consequences for bacterial growth, the material BioMig testing method  
151 was applied<sup>18</sup>. This method comprises a migration assay and a growth potential assay.  
152 In short: for the migration assay, 100 cm<sup>2</sup> of EPDM was incubated (60°C, 24h, without  
153 shaking) with 100 mL bottled water (Evian). Over the course of seven days, the EPDM  
154 material was transferred into a new microcosm with fresh water every day. After the  
155 1<sup>st</sup>, 3<sup>rd</sup>, and 7<sup>th</sup> day of incubation, the water was sampled and the migrated total organic  
156 carbon (TOC) was quantified (see below). In addition, the growth of bacteria in the  
157 migration water was assessed. For this, 1 mL of fresh Evian bottled water was  
158 inoculated into 20 mL of migration water, with the addition of 690 µL  
159 phosphate/nitrogen buffer and 10 µL FeCl<sub>3</sub>. This test was performed in sterile, muffled  
160 40 mL glass vials with screw caps lined with a PTFE septum (Supelco, Sigma-Aldrich  
161 Chemie GmbH, Buchs, Switzerland). Incubation (30°C, 120 rpm, 6 d) was followed by  
162 the quantification of the total cell concentration (TCC) using flow cytometry (FCM) (see  
163 2.6.3). For the growth potential assay, 100 cm<sup>2</sup> of new EPDM material was incubated  
164 (30°C, 14 d) with 100 mL of fresh bottled water (Evian) and additional nutrients (see  
165 2.2). After 14 d of incubation, the water and biofilm phases were sampled for TCC,  
166 allowing for the determination of the bacterial growth potential within the experimental  
167 microcosms due to migrating carbon compounds (in direct comparison to a glass  
168 control set up without additional carbon)<sup>18</sup>.

169



## 170 **2.4 Selection experiment**

171 For all five water samples, triplicate microcosms were assembled with the testing  
172 material (EPDM) and an additional one containing glass as a control set up (Figure 1,  
173 B), as described above. After assembly ( $t_0$ ), the microcosms were incubated (14 d,  
174 35°C, 90 rpm) (Figure 1, C). After 14 days ( $t_1$ ), biofilms were removed from the material  
175 surface (EPDM and glass; see 2.6.2) and both the biofilm and water phase of each  
176 microcosm were sampled for TCC (see 2.6.3) and community composition by 16S  
177 rRNA gene sequencing (see 2.6.4). For a second selection step, biofilm samples were  
178 re-inoculated into new microcosms. For this, the corresponding drinking water matrix  
179 was filtered using sterile bottle top filter units and membrane filters (Whatman®  
180 Nucleopore™ Track-Etched Membranes, 47 mm, 0.2 µm, Sigma Aldrich). New  
181 material was cleaned and stacked, additional nutrients added, and selected biofilm  
182 communities were added in a final concentration of  $1 \times 10^7$  cells/microcosm (i.e.,  $1 \times$   
183  $10^5$  cells/mL). After another 14d incubation, biofilms and water phases of all  
184 microcosms were again sampled ( $t_2$ ), following the same procedure. Regarding  
185 terminology, in the course of this study, initial drinking water communities are referred  
186 to as *original drinking water communities* and the biofilm communities of  $t_1$  and  $t_2$  as  
187 *selected biofilm communities*.

188

## 189 **2.5 Attachment experiment**

190 Here we compared attachment dynamics of selected biofilm communities with the  
191 original drinking water communities. The same microcosm set up was used as  
192 described above, with triplicate experimental microcosms (EPDM coupons) and single  
193 control microcosms (glass slides). The starting concentration of bacteria in the water  
194 phase (TCC,  $t_0$ ) was adjusted to be the same by diluting the biofilm communities

195 relative to the drinking water TCC. The microcosms were incubated (35°C, 90 rpm)  
196 and the TCC in the water phase was measured for all at 30 min intervals over the  
197 course of 5 h ( $t_1 - t_{10}$ ).

198

## 199 **2.6 Sampling and analysis**

200

### 201 **2.6.1 Chemical water analysis**

202 Total organic carbon (TOC) was measured using a TOC-V<sub>CPH</sub> Analyzer (Shimadzu  
203 Schweiz GmbH, Reinach, Switzerland). The minimum detection limit of the instrument  
204 is 0.1 mg/L. For total phosphorous, samples were chemically digested with potassium  
205 peroxodisulfate at 121°C, followed by a reaction to a phosphorous-molybdenum-blue  
206 complex and the determination of ortho-phosphate with spectrophotometry. The  
207 minimum detection limit of this method was 3.0 µg/L. Total nitrogen concentrations  
208 were measured via chemiluminescence using a Shimadzu TOC-L<sub>CSH</sub> instrument. The  
209 minimum detection was 0.5 mg/L.

210

### 211 **2.6.2 Biofilm removal**

212 All biofilms were removed with an electrical toothbrush (Oral-B<sup>®</sup>, Advanced Power)  
213 and toothbrush heads were replaced after each use to prevent cross-contamination.  
214 In short: EPDM or glass coupons were placed into muffled glass petri dishes and  
215 covered with filtered (0.2 µm) water. The water volume was always 25 mL per coupon  
216 (i.e., a total of 100 mL per microcosm). The coupons were brushed one by one, for  
217 approximately 90 sec each (including both coupon sides and the edges). During  
218 biofilm removal, 10 mL were saved and after the biofilm removal from all four coupons  
219 of a microcosm. This volume was ultimately used to recover biofilm residuals in the

220 petri dish and on the brush head, by pouring the 10 mL filtered water into the petri dish  
221 and brushing without any coupon. The biofilm suspensions of the microcosms were  
222 collected in individual, sterile 100 mL SCHOTT Duran<sup>®</sup> bottles. 10 mL of the biofilm  
223 suspension was used for flow cytometry (see 2.6.3). The rest of the biofilm suspension  
224 was used for the re-inoculation in the selection experiment (see 2.4), for further steps  
225 on community analysis (see 2.6.4), or for the attachment experiments (see 2.5).

226

### 227 **2.6.3 Flow cytometry for the quantification of total cell concentrations**

228 FCM was used for the determination of total cell concentrations (TCC) in all biofilm  
229 and water samples. For biofilms, a 10 mL subsample of the biofilm suspension (see  
230 2.6.3) was collected and needle-sonicated in a round-bottom glass tube (DURAN<sup>®</sup>;  
231 Faust Laborbedarf AG, Schaffhausen, Switzerland) using the Sonopuls HD 2200  
232 instrument (Bandelin Sonorex, Rangendingen, Germany) and the Sonotrode  
233 Sonopuls MS 73 (tip diameter 3 mm, Bandelin). Sonication settings were: 30 sec at  
234 50% power, and 40% amplitude intensity, with the pulse amplitude of the needle being  
235 308 µm. The sonicated biofilm samples were then diluted 10-100x using 0.1 µm filtered  
236 Evian water (Millex<sup>®</sup>-VV, Merck-Millipore), while the water samples were measured  
237 undiluted. For the detection of TCC, samples were stained with 10 µL/mL SYBR<sup>®</sup>  
238 Green I (SG, Invitrogen AG, Basel, Switzerland; 100x diluted in 10mM Tris buffer, pH  
239 8). Stained samples were incubated (37°C, 10 min) and measured using a BD Accuri  
240 C6<sup>®</sup> flow cytometer (BD, Belgium) or a CytoFLEX Flow Cytometer (Beckman Coulter  
241 International SA, Nyon, Switzerland). Gates and settings were kept the same within  
242 experiments. For more detailed information on data analysis and gating strategies  
243 see<sup>19</sup>.

244

## 245 **2.6.4 16S rRNA gene-based community analysis**

246 For sequencing, samples of (1) all original drinking waters ( $t_0$ ), (2) all selected biofilms  
247 ( $t_1$ ,  $t_2$ ), and the water phase of the microcosms ( $t_1$ ,  $t_2$ ) were concentrated onto 0.2  $\mu\text{m}$   
248 polycarbonate Nucleopore<sup>®</sup> membrane filters ( $\varnothing$  47 mm, Whatman, Kent, United  
249 Kingdom) by vacuum filtration, using sterile bottle top filter units. Filters were  
250 immediately frozen in liquid nitrogen and stored at  $-20^\circ\text{C}$ .

251

### 252 **2.6.4.1 DNA extraction**

253 The DNeasy PowerWater<sup>®</sup> Kit (Qiagen, Hilden, Germany) was used for DNA  
254 extraction and performed according to the provided protocol. Extracted DNA was  
255 frozen and stored at  $-20^\circ\text{C}$  until further processing.

256

### 257 **2.6.4.2 Library preparation and sequencing**

258 For analyses on bacterial community compositions, the V3-V5 region of the 16S rRNA  
259 gene was amplified via polymerase chain reaction (PCR), using the primers  
260 Bakt\_341F and Bakt\_805R<sup>20</sup>. For library preparation, extracted DNA was quantified in  
261 duplicates using a Spark<sup>®</sup> 10M Multimode Microplate Reader (Tecan, Switzerland;  
262 Qubit<sup>™</sup> DNA Broad Range Assay). DNA concentrations were normalized between  
263 samples prior to amplification (1 ng DNA / 11  $\mu\text{L}$ ). For the PCR, normalized DNA was  
264 mixed with 2xKAPA HiFi HotStart Ready Mix (Kapa Biosystems, Roche Holding AG).  
265 Primers were added in a final concentration of 0.3  $\mu\text{M}$  (details see Table S2, A). In  
266 addition to experimental samples, a negative control (i.e., amplification of sterile water  
267 instead of sample-DNA) and a positive control (self-made MOCK community: pure  
268 DNA of *Burkholderia xenovorans*, *Bacillus subtilis*, *Escherichia coli*, *Micrococcus*  
269 *luteus*, *Pseudomonas protegens*, *Paenibacillus sabinae*, and *Streptomyces*

270 *violaceoruber*) were amplified. Additionally, some experimental samples were  
271 amplified in replicates. For this PCR, all samples were amplified in duplicates (2 x 25  
272  $\mu$ L reactions), which were combined prior to clean up. Amplified products were purified  
273 using the Agencort AMPure XO System (Beckman Coulter, Inc., Brea, CA, United  
274 States). For this, products were attached to magnetic beads, washed with 80% EtOH,  
275 and re-suspended in 10 mM Tris, pH 8.0. To enable pooling and re-identification of  
276 individual samples, specific sequencing Nextera XT v2 Index Kit adapters (Illumina)  
277 were annealed to the amplicons via Index PCR (Table S2, B). Products were again  
278 cleaned using the AMPure approach, quantified, and quality was checked using the  
279 High Sensitivity D1000 ScreenTape system (Agilent 2200 Tape Station). All samples  
280 were normalized to a concordant concentration followed by the pooling of 5  $\mu$ L per  
281 sample. This pool was adapted to a final concentration of 2 mM and the base-pair (bp)  
282 length of the product determined with the Tape Station (627 bp).  
283 Sequencing was performed using the MiSeq platform. For this, 0.1M NaOH was added  
284 to the pool, centrifuged (300 g, 60 s) and incubated for 5 min (room temperature) prior  
285 to the addition of the hybridization buffer HT1. This step was to (1) generate single  
286 stranded DNA and to (2) prevent unspecific bindings to the flow cell during  
287 sequencing. As a final step, 10% PhiX was added as a sequencing run control  
288 (Illumina: Technical Note on PhiX Control). The MiSeq run was a paired-end 600 cycle  
289 sequencing run. Data on community composition was generated in collaboration with  
290 the Genetic Diversity Center (GDC), ETH Zurich.

291

#### 292 **2.6.4.3 Processing of sequencing data**

293 Data processing followed a distinct pipeline. First, data quality was controlled using  
294 FastQC (Table S2, A). Then, read ends were trimmed and merged (Table S2, B),

295 which was followed by an *in silico*-PCR and the trimming of the primer sites (Table S2,  
296 C). Finally, sequences were filtered (based on quality and size range) (Table S2, D)  
297 and amplicon sequence variants (ASV) were generated and taxonomically assigned.  
298 The clustering of sequences was performed as presented in a previous study<sup>14</sup>. It is  
299 based on an amplicon sequence variant (ASV) approach using UNOISE3, proposed  
300 by Edgar and colleagues<sup>21</sup>, and includes a correction for sequencing errors and a  
301 chimaeral removal. Clustered sequences are called zero-radius operational taxonomic  
302 units (ZOTUs). Due to a potential overestimation of the actual number of ZOTUs, an  
303 additionally clustering was performed at different identity levels of 99, 98, and 97%.  
304 For predictions on taxonomic assignments, the Silva 16S database (v128) and the  
305 SINTAX classifier were used (cut-off 0.9). See supplementary information for details  
306 on data analysis using R (Version 3.3.0) and RStudio (Version 1.1.477).

### 307 3. Results

308

#### 309 3.1 Migration and growth potential assays

310 Applying an established material testing package (BioMig<sup>18</sup>) revealed that a  
311 considerable amount of organic carbon migrates from the experimental EPDM  
312 coupons and that a substantial fraction of the migrating carbon can be used by drinking  
313 water bacteria to grow. The migration assay (60 °C) showed that organic carbon  
314 migrated in high concentrations from new EPDM coupons and that it increased the  
315 TOC concentration of the water 5-fold (average: 1.1 µg TOC/mL, n = 2) within the first  
316 24 h of migration (Figure 2A). The extent of migration diminished over time. However,  
317 even after 7 d of sequential migrations, the TOC concentration of the water with EPDM  
318 coupons still increased 3-fold ( $0.43 \pm 0.03$  µg TOC/mL, n = 2), equivalent to a rate of  
319 0.3 µg TOC/cm<sup>2</sup>/d. These values are typical for flexible materials in contact with  
320 drinking water (e.g., in general<sup>14,22</sup>, or specifically for EPDM<sup>23,24</sup>). A separate growth  
321 potential assay at 30 °C showed that  $2.3 \pm 0.09 \times 10^7$  cells/mL (n = 3) were able to  
322 grow on migrating carbon from EPDM coupons during 14 days, which is 30x more  
323 compared to growth in the absence of EPDM (Figure 2B). Given that the carbon-  
324 source for growth was the EPDM coupons, this translated to the growth of  $2.3 \times 10^7$   
325 cells/cm<sup>2</sup> coupon. Of these cells, 57 % (i.e.,  $1.3 \times 10^7$  cells/cm<sup>2</sup>) were recovered  
326 directly from the surface of the EPDM coupons. To summarize, results show that the  
327 EPDM coupons favor biofilm formation by (1) providing a surface for colonization and  
328 by (2) adding biodegradable organic carbon to the water. Therefore, this material was  
329 deemed suitable for the further experiments on biofilm growth and the selection within  
330 growing communities (below).

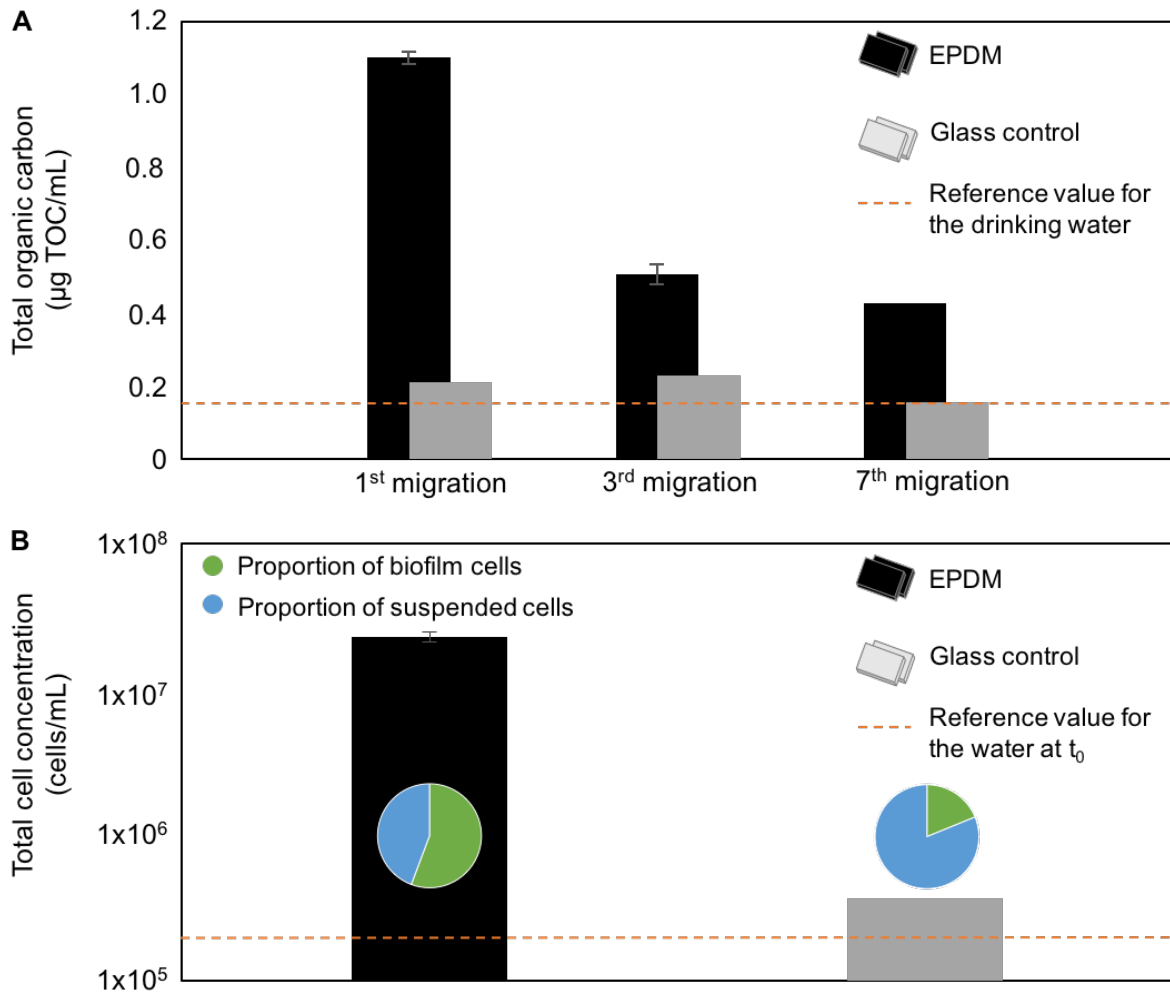

331

332 **Figure 2** Assessment of carbon migration from EPDM and the resulting potential for  
333 bacterial growth. (A) Migration assay for the quantification of total organic carbon  
334 (TOC) in microcosms with EPDM or glass coupons. Material was transferred into fresh  
335 microcosms every 24 h, with measurements after the 1<sup>st</sup>, 3<sup>rd</sup>, and 7<sup>th</sup> migration. (B)  
336 Bacterial growth potential based on EPDM, or glass as control. Total cell  
337 concentrations (TCC) are shown per mL for total growth of both suspended and biofilm  
338 cells. The conversion of cm<sup>-2</sup> for biofilm cells to mL<sup>-1</sup> was based on the water volume  
339 to material surface area ratio of 1:1 in the microcosm set up. Proportions of biofilm and  
340 suspended cells are indicated via pie charts. Error bars represent the range between  
341 duplicate microcosms in (A) and standard deviations for triplicate microcosms in (B).



## 342 **3.2 Selection experiment**

343 The basic concept and design of the growth potential assay was used to test the  
344 growth of five different drinking water communities on identical EPDM coupons (Figure  
345 1). All communities showed (1) intensive growth and (2) a considerable loss in taxa  
346 diversity (apart from B2), with (3) the development of different biofilm communities  
347 involving shared taxa.

348

### 349 **3.2.1 Considerable growth for different original drinking water communities**

350 Figure 3 shows that after two sequential 14-day cycles of inoculation and incubation  
351 (Figure 1), substantial growth was measured for all five waters in the presence of  
352 EPDM coupons, ranging within one order of magnitude ( $0.2 - 3.3 \times 10^8$  cells/mL).  
353 These final concentrations represent both the planktonic and biofilm phases. The  
354 proportion of cells recovered directly from the biofilm ranged between 59 – 86 %,  
355 equivalent to  $0.2 - 2 \times 10^8$  cells/cm<sup>2</sup>. While experimental microcosms had considerable  
356 growth, differences were identified. Growth in the absence of EPDM coupons (i.e., in  
357 the glass controls) highlighted the impact of the migrating carbon, showing that TCC  
358 concentrations were 93 – 99 % lower without the additional carbon source. The  
359 proportion of cells in the biofilm was still high with 30 – 93 %, which translates to  $1.4$   
360  $\pm 0.5 \times 10^6$  cells/cm<sup>2</sup> (n = 5). These findings confirm our results from Figure 2 on the  
361 carbon migration and growth potential based on EPDM coupons. The results show  
362 that the growth is high for different drinking water communities and that there was  
363 substantial biofilm growth, irrespective of the starting community.

364

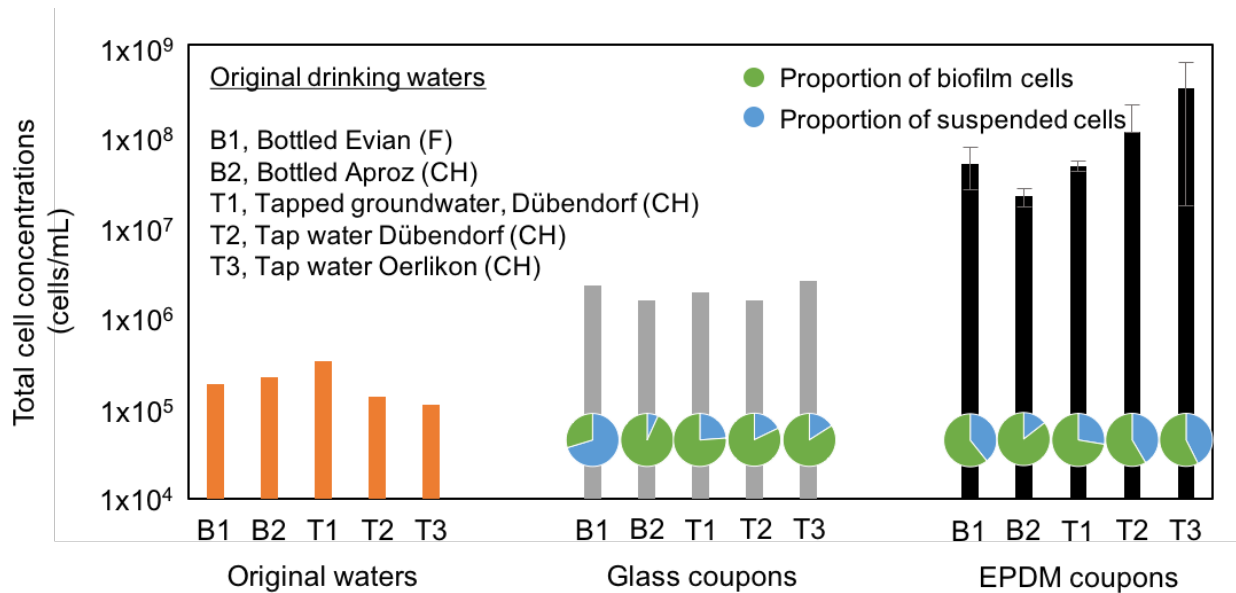

365

366 **Figure 3** Total cell concentrations in the original drinking waters ( $t_0$ ) and in microcosms

367 at the end of the experiment ( $t_2$ ), i.e., 2 x 14 d of incubation with an intermediate re-

368 inoculation of biofilms grown at  $t_1$ . For growth in microcosms with glass and EPDM

369 coupons, total cell concentrations (TCC) are shown per mL for the total growth of both

370 suspended and biofilm cells. The conversion of  $\text{cm}^{-2}$  for biofilm cells to  $\text{mL}^{-1}$  was based

371 on the water volume to material surface area ratio of 1:1 in the microcosm set up.

372 Proportions of biofilm and suspended cells are indicated via pie charts. Error bars

373 represent standard deviations for triplicate microcosms in the EPDM coupon set up.

374

### 375 **3.2.2 Comparatively low taxa diversity detected in biofilm communities**

376 A comparison of the original drinking water communities with the biofilm communities

377 at the conclusion of the experiment revealed a notable loss in diversity (apart from B2,

378 see below). Richness, i.e., the number of different taxa, decreased and became more

379 comparable between the different waters. Figure 4A shows the richness values for the

380 five original drinking water communities. Interestingly, tapped waters showed

381 considerably more taxa ( $2'178 \pm 131$ ,  $n = 9$ ) than the bottled waters, with the original

382 water B2 comprising strikingly few taxa ( $54 \pm 0$ ,  $n = 3$ ) compared to B1 ( $270 \pm 15$ ,  $n =$

383 3). Overall, biofilm communities comprised comparatively few taxa (29 – 50 taxa),  
384 which corresponded to a diversity loss of 46 – 98 % from the original waters. This  
385 impressive loss of up to 2'000 individual taxa (tap waters) highlights the relevance of  
386 nutrient-based selection within establishing biofilm communities. As a consequence to  
387 this loss in diversity (through growth and selection), the similarity between the biofilm  
388 communities increased (with respect to diversity), with only 21 % variation in richness  
389 between biofilms as opposed to 73 % between the original drinking water  
390 communities. Shannon diversity followed a similar trend. Figure 4B shows a  
391 comparable dissimilarity between the original tapped water communities ( $5.9 \pm 0.7$ ,  $n$   
392  $= 9$ ) and bottled water communities ( $2.3 \pm 0.03$ ,  $n = 3$  for B1;  $1.1 \pm 0.01$ ,  $n = 3$  for B2).  
393 The relation between the Shannon Index ( $H'$ ) and its maximum value ( $H'_{\max}$ ) is  
394 important for drawing conclusions on diversity, i.e., the closer  $H'$  to  $H'_{\max}$ , the higher  
395 the diversity within the community. Here, the relation was 1:1.3 for the tapped waters,  
396 1:2.5 for B1, and 1:3.7 for B2 respectively, indicating a higher diversity in the tapped  
397 waters. This difference decreased with biofilm formation, resulting in a comparable  
398 degree of diversity. Here, the ratio between  $H'$  and  $H'_{\max}$  is close to 1:3 for all samples.  
399 This shows that (1) diversity decreased for (almost) all communities and (2) that biofilm  
400 communities are more similar to each other compared to the original drinking water  
401 communities. As indicated above, bottled water B2 was the misfit amongst the original  
402 water communities with a particularly low initial richness and diversity. Interestingly,  
403 this community also grew the least during the selection experiment (Figure 3). This  
404 suggests that the initially low diversity did not allow the community to metabolize as  
405 many nutrients as for the other more diverse communities. Results on richness and  
406 Shannon diversity allowed for the calculation of Evenness. Evenness indices were low  
407 for the bottled waters ( $0.34 \pm 0.07$ ,  $n = 6$ ) and did not change much during the growth

408 experiment ( $0.35 \pm 0.09$ ,  $n = 6$ ). For the original tapped waters, Evenness was high  
409 ( $0.77 \pm 0.08$ ,  $n = 9$ ), indicating a rather equal distribution of taxa. For the tapped water  
410 biofilms, indices decreased approx. 50 % which resulted in comparable Evenness  
411 indices for all samples ( $0.37 \pm 0.1$ ,  $n = 15$ ).  
412

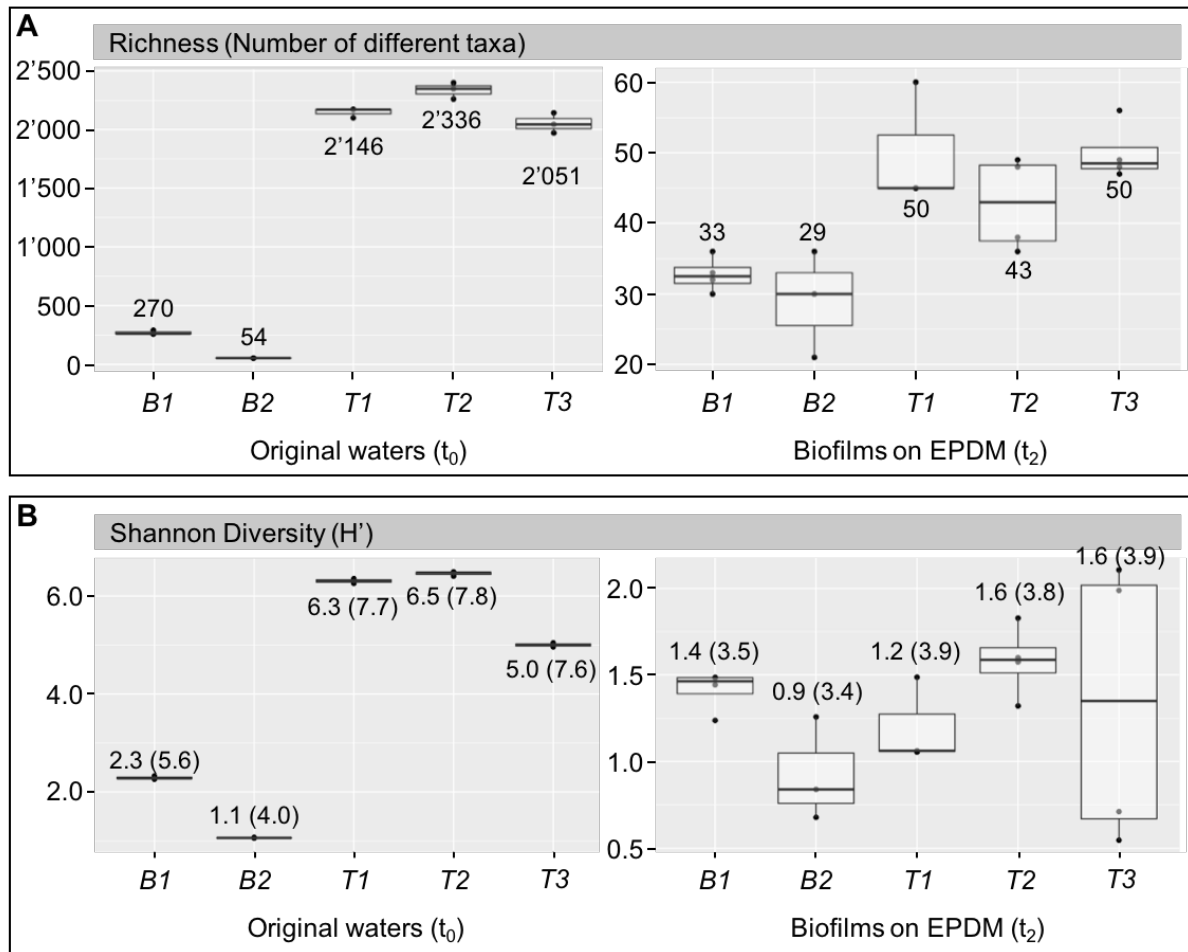

413  
414 **Figure 4** Diversity between microbial communities following growth on EPDM  
415 coupons. Alpha-diversity indices richness (A) and Shannon diversity (B) of the original  
416 drinking water communities (B1, B2, T1, T2, and T3) and the selected biofilm  
417 communities grown on EPDM ( $t_2$ ) for each experimental water. Results are presented  
418 as averaged numbers for richness (A) and averaged Shannon indices with additional  
419 information on ( $H'_{max}$ ). Original drinking waters were sequenced in triplicates and  
420 biofilms were sampled from triplicate experimental microcosms (additional sampling

421 points in plot are due to replicate sampling of selected biofilms).

422

423 What is particularly interesting is that, involving already severe loss in taxa diversity  
424 and richness (i.e., a strong selection), the low degree of evenness within biofilm  
425 communities indicated a dominance of an even smaller number of taxa. This was, in  
426 fact, the case with the five most abundant taxa accounting for  $95 \pm 5\%$  ( $n = 15$ ) of the  
427 individual biofilm community compositions (Table S4). These results highlight that (1)  
428 the bottled waters had low diversities from the start, (2) the number of different taxa  
429 decreased during biofilm formation and so did (3) the equality of their distribution. This  
430 rendered all biofilm communities more similar, with comparably low diversity and (4)  
431 only view taxa dominating the entire biofilm communities.

432

### 433 **3.2.3 Biofilm growth alters community composition**

434 The decrease in taxa diversity came along with a change in community composition  
435 from the original drinking water to the selected biofilm communities. Figure 5 illustrates  
436 the dissimilarities between the bacterial communities of the original drinking waters ( $t_0$ ,  
437 triangles) and their corresponding biofilm communities that grew on EPDM coupons  
438 ( $t_2$ , circles). The distance between original and biofilm communities was large for the  
439 tapped waters (e.g., highlighted for T3, Figure 5).

440

441

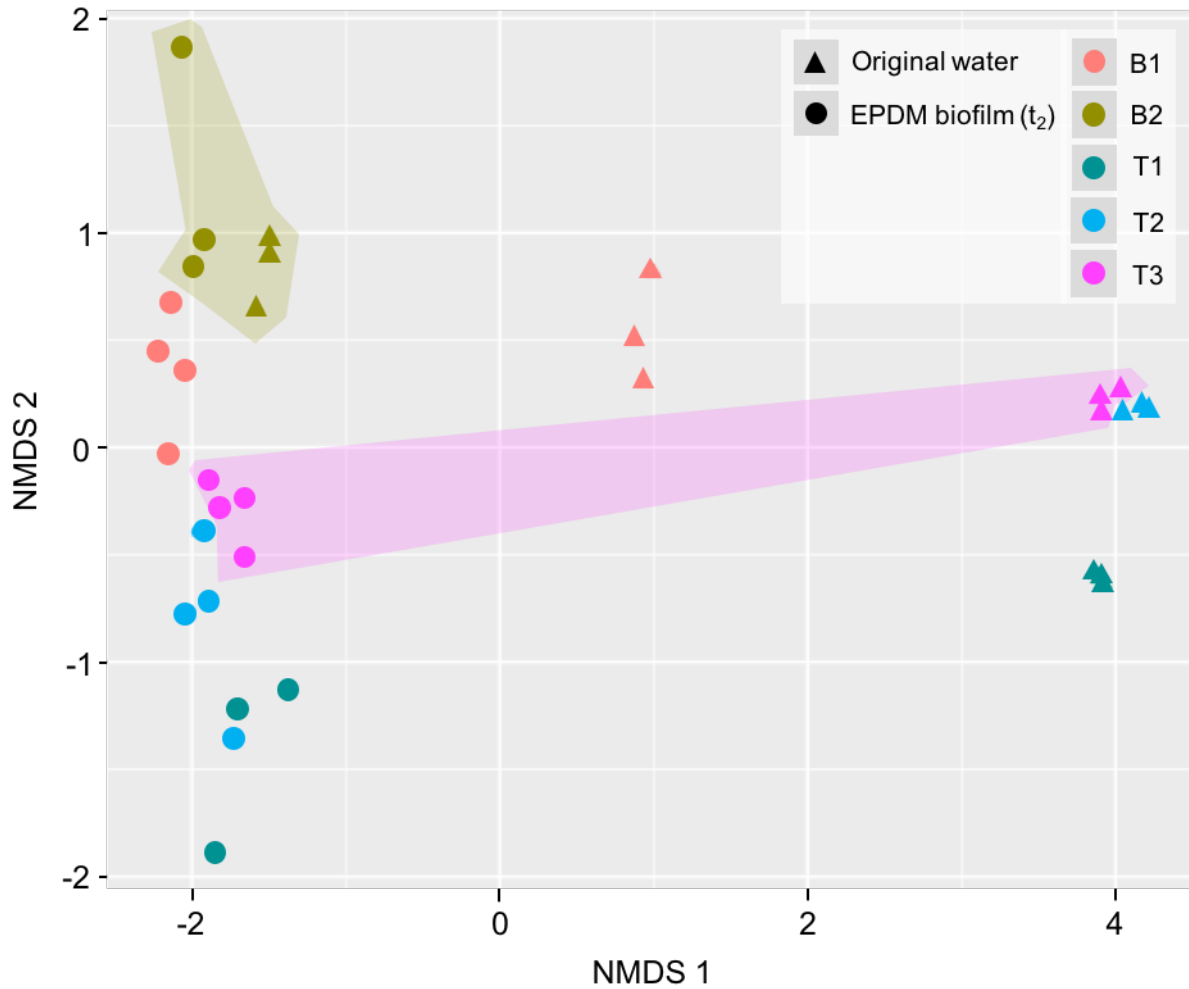

442

443 **Figure 5** NMDS ordination plot based on Bray-Curtis Dissimilarity. Comparison of five  
444 different original drinking water communities (B1, B2, T1, T2, and T3) and their  
445 corresponding biofilms that formed on EPDM ( $t_2$ ). Original drinking waters were  
446 sequenced in triplicates and biofilms were sampled from triplicate experimental  
447 microcosms (additional sampling points in plot are due to replicate sequencing of  
448 selected biofilm samples). Highlighted areas were added manually to emphasize  
449 differences between samples.

450

451 In accordance with the degree of diversity loss, these community compositions  
452 changed considerably more compared to the bottled waters, which was attributed to  
453 the higher loss in taxa richness. Here, Bray-Curtis (BC) indices indicated a dissimilarity

454 of 100 % between original and biofilm communities on taxa level (BC  $1.0 \pm 0.0$ ,  $n = 3$ ).  
455 In comparison, the dissimilarity was smaller for communities of B2 (highlighted in  
456 Figure 5), with BC indicating a dissimilarity of 89 %. The higher degree of similarity for  
457 B2 indicated that (1) the community composition changed comparatively little during  
458 biofilm formation. This indicates, in combination with the low growth, that diversity in  
459 the original B2 did not cover enough metabolic functions to exploit the full growth  
460 potential provided by migrating carbon. To emphasize this, 83 % of the most abundant  
461 taxa of B2 biofilms (i.e., the 5 most abundant taxa amongst triplicate microcosms)  
462 were also detected in the original water community (Table S5), which is high compared  
463 to B1 (56 %) or the tapped waters (38 – 50 %). Interestingly, when comparing samples  
464 of different origin (i.e., with different starting communities), biofilms were more similar  
465 to each other compared to the original drinking water communities. Here, Bray-Curtis  
466 dissimilarity between original drinking water communities was  $0.94 \pm 0.1$  ( $n = 5$ ) and  
467 resulted in a BC of  $0.83 \pm 0.16$  ( $n = 5$ ) between biofilms. In summary, accompanying  
468 the reduction in taxa diversity, the community compositions of the original waters  
469 changed during biofilm formation and become more similar to each other. What  
470 remains unclear is whether the loss in diversity and compositional changes  
471 necessarily involved the growth of identical taxa.

472

### 473 **3.2.4 Similarities in biofilm communities**

474 Biofilm communities that developed from different (original drinking water) starting  
475 communities comprised shared taxa and families. Out of  $29 \pm 12$  taxa/biofilm  
476 community ( $n = 15$ ; including taxa with  $\geq 0.01$  % relative abundance), only two taxa  
477 were present in all biofilms that grew on EPDM coupons (Table S4). These taxa were  
478 identified as (1) *Methylobacterium* spp. ( $0.3 \pm 0.1$  %,  $n = 15$ ; ZOTU7) and as (2) a not

479 further identified member of the family Bradyrhizobiaceae ( $0.5 \pm 0.6$  %,  $n = 15$ ;  
480 ZOTU23). Taxa that were detected in at least one of the experimental triplicates per  
481 set up were (1) a member of Bacillaceae ( $0.04 \pm 0.05$  %,  $n = 13$ ; ZOTU148), (2)  
482 *Aquabacterium* spp. ( $23 \pm 29$  %,  $n = 13$ ; ZOTU1024), and (3) a member of the family  
483 Comamonadaceae ( $10 \pm 16$  %,  $n = 14$ ; ZOTU5147). Here, ZOTU5147 was very  
484 abundant in the biofilms of B1 ( $35 \pm 14$  %,  $n = 3$ ) and ZOTU1024 in the biofilms of T1  
485 ( $70 \pm 9$  %,  $n = 3$ ) and T2 ( $49 \pm 8$  %,  $n = 3$ ). Out of  $16 \pm 6$  families/biofilm community ( $n$   
486 = 15), four families were present in all EPDM biofilms, namely (1) Bradyrhizobiaceae  
487 ( $0.6 \pm 0.6$  %,  $n = 15$ ), (2) Comamonadaceae ( $43 \pm 28$  %,  $n = 15$ ), (3)  
488 Methylobacteriaceae ( $0.3 \pm 0.1$  %,  $n = 15$ ), and (4) Sphingomonadaceae ( $3 \pm 7$  %,  $n =$   
489 15) (Table S6). In addition, the families (1) Bacillaceae ( $0.05 \pm 0.05$  %,  $n = 13$ ), (2)  
490 Brucellaceae ( $0.03 \pm 0.02$  %,  $n = 13$ ), (3) Burkholderiaceae ( $22 \pm 30$  %,  $n = 13$ ), (4)  
491 Caulobacteraceae ( $4 \pm 6$  %,  $n = 13$ ), and (5) Xanthomonadaceae ( $8 \pm 13$  %,  $n = 13$ )  
492 were present in at least one triplicate per experimental set up. Of these,  
493 Comamonadaceae was highly abundant in the biofilm communities of T1 ( $71 \pm 10$  %,  $n = 3$ )  
494 and T2 ( $61 \pm 14$  %,  $n = 3$ ). For the bottled waters, Burkholderiaceae was  
495 dominant in B2 ( $71 \pm 15$  %,  $n = 3$ ) and Xanthomonadaceae showed a high abundance  
496 in the biofilm communities of B1, with a relative abundance of up to 18 %. This result  
497 highlights that biofilm communities had a certain consistency in their compositions,  
498 despite clear differences in their starting communities. The selective pressure during  
499 biofilm formation and growth was not only demonstrated by the loss of taxa but also  
500 by the dominance of originally rare taxa. Within individual biofilm communities, the five  
501 most abundant taxa accounted for  $94 \pm 5$  % ( $n = 15$ ) (Table S4). From these individual  
502 abundant taxa,  $53 \pm 17$  % ( $n = 5$ ) were detectable in the corresponding original drinking  
503 water communities (i.e., the rest was below detection limit of the method). Interestingly,



504 the chance of dominant biofilm taxa also being abundant in the original drinking water  
505 community was associated with the degree of initial diversity. For example, a highly  
506 abundant taxon in T1 biofilms ( $70 \pm 10$  %,  $n = 3$ ; ZOTU1024) was rarely detected in  
507 the original water with a relative abundance of only  $0.03 \pm 0.01$  % ( $n = 3$ ) (Table S5).  
508 Bottled water B2 had the lowest taxa richness and diversity. Here, the most abundant  
509 biofilm taxa ( $71 \pm 15$  %,  $n = 3$ ; ZOTU46) was already very abundant in the original  
510 water ( $8 \pm 0.4$  %,  $n = 3$ ; ZOTU46). These results show that biofilm formation on carbon  
511 supplying EPDM coupons was highly selective and resulted in a considerable loss in  
512 taxa richness and diversity. As a result, the composition of biofilm communities differed  
513 from their original drinking water communities. Individual biofilms showed, however,  
514 similarities regarding dominant organisms, which indicated that, irrespective of starting  
515 communities, the environment (i.e., additional carbon supply) was selective for specific  
516 taxa and families, which was potentially linked to metabolic functions (see, e.g., <sup>25</sup>).

517

### 518 **3.3 Attachment experiment**

519 The selected biofilm communities attached more and much faster to new surfaces  
520 compared to the original water communities (Figure 6).

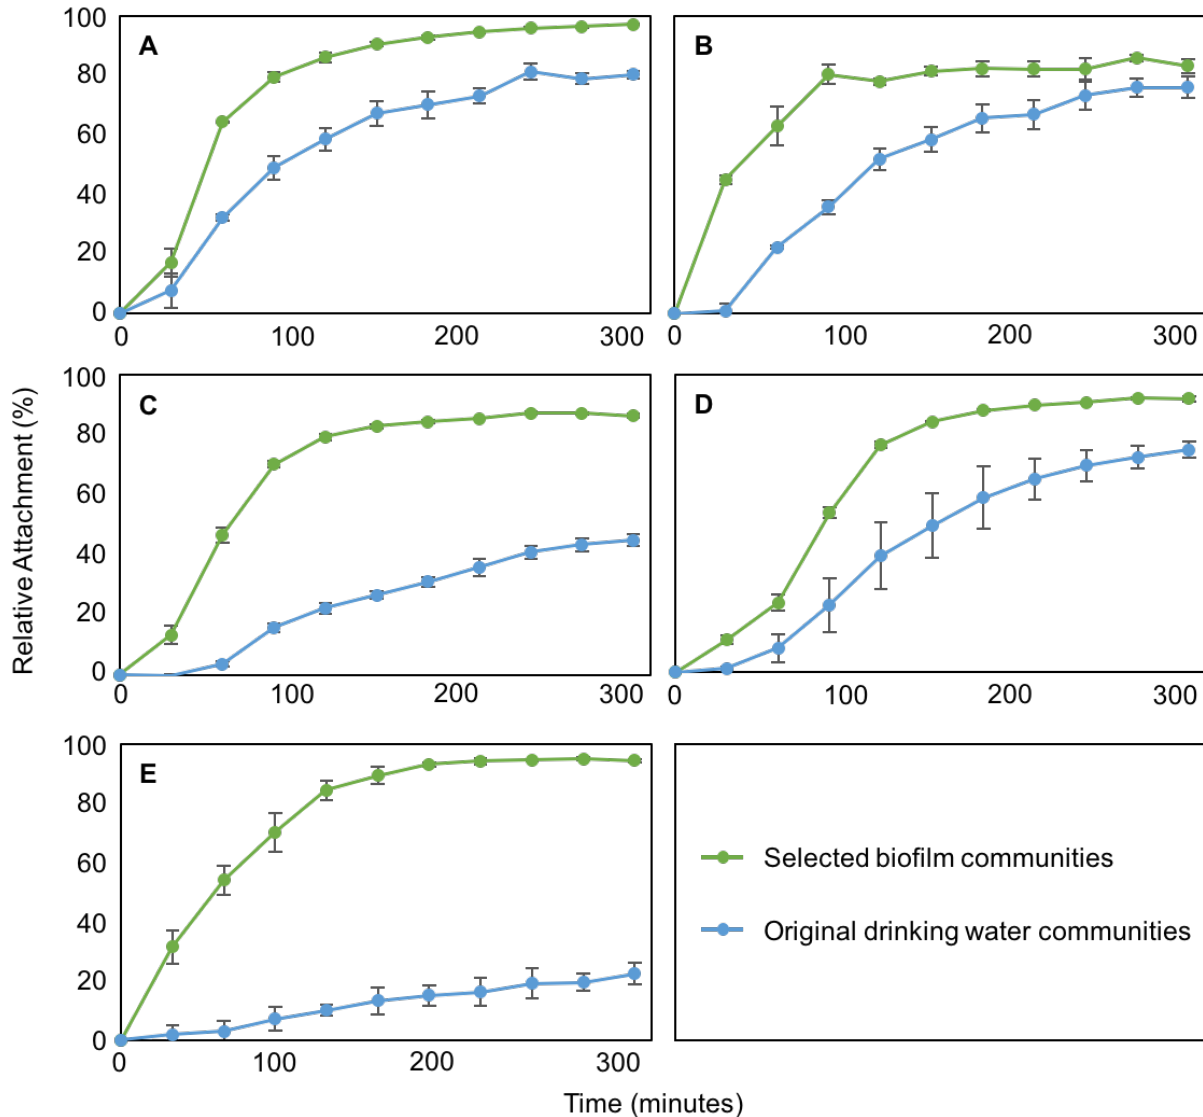

521

522 **Figure 6** Attachment of selected biofilm and original drinking water communities to  
523 EPDM coupons. (A) B1 (bottled Evian; F), (B) B2 (bottled Aproz; CH), (C) T1 (tapped  
524 groundwater, Dübendorf; CH) (D) T2 (tap water, Dübendorf; CH) (E) T3 (tap water,  
525 Oerlikon; CH). Data points show average values and standard deviations for triplicate  
526 experiments.

527

528 For the selected communities,  $91 \pm 5\%$  ( $n = 15$ ) of the cells attached within the first 5  
529 hours after exposing freshly suspended cells to new EPDM coupons. This was approx.  
530 30% more than for the original water communities ( $69 \pm 23\%$ ,  $n = 15$ ). Between the

531 original communities, strong differences were measured in maximum attachment. For  
532 example, cells from original water B1 attached to  $80 \pm 1 \%$  ( $n = 3$ ) within 5 hours as  
533 opposed to T1 with only  $45 \pm 2 \%$  ( $n = 3$ ). The direct comparison between original and  
534 selected communities showed a clear advantage for the selected cells. For example,  
535 after 5 hours of incubation one tapped water (T3) showed a relative attachment of  $94$   
536  $\pm 1 \%$  ( $n = 3$ ) for the selected community, but only  $22 \pm 4 \%$  ( $n = 3$ ) for the original  
537 community (Figure 6E). In absolute numbers, this percentage translates to a maximum  
538 attachment of  $6.7 \pm 0.1 \times 10^4$  cells/cm<sup>2</sup> ( $n = 3$ ) for the selected community and  $1.4 \pm$   
539  $0.3 \times 10^4$  cells/cm<sup>2</sup> ( $n = 3$ ) for the original community (Table S6). In addition to the high  
540 maximum attachment, maximum attachment rates were on average  $5.0 \pm 1.7 \times 10^4$   
541 cells/cm<sup>2</sup>/h ( $n = 15$ ) in selected communities and  $2.4 \pm 1.2 \times 10^4$  cells/cm<sup>2</sup>/h ( $n = 15$ )  
542 in original communities. Regarding T3, maximum attachment rate for selected cells  
543 was almost 10-fold higher with  $3.9 \pm 0.4 \times 10^4$  cells/cm<sup>2</sup>/h ( $n = 3$ ) as opposed to  $4.6 \pm$   
544  $0.9 \times 10^3$  cells/cm<sup>2</sup>/h ( $n = 3$ ). The comparison of the relative attachment between  
545 selected and original communities of all waters showed a 1- to 4-times higher  
546 maximum attachment and a 1- to 7-times higher maximum attachment rate for the  
547 selected communities. Interestingly, the attachment dynamics were similar with glass  
548 coupons as surface (Figure S1). Maximum attachment rates were almost identical  
549 between EPDM and glass coupons. Maximum attachment after 5 hours was, however,  
550 6-fold higher on EPDM coupons (Table S7). In summary, a considerably large  
551 proportion of planktonic cells attached to the coupons (both EPDM and glass) within  
552 a short time. The selected communities attached faster and showed higher absolute  
553 values for attachment compared to the original drinking water communities.

554

555

## 556 **4. Discussion**

557

558 We analyzed biofilm growth on flexible EPDM coupons for five different drinking water  
559 communities (Figure 1). The purpose was to study the amount of growth due to  
560 biodegradable carbon migrating from the EPDM (Figure 2) and to assess selection  
561 within the developing biofilm communities due to this carbon. In the course of biofilm  
562 growth (Figure 3), all samples showed a significant loss in species diversity (Figure 4)  
563 with, however, the development of different community compositions (Figure 5). The  
564 selected communities were in turn more likely to form new biofilms on clean coupons  
565 (Figure 6).

566

### 567 **4.1 Nutrient-based selection within microbial communities**

568 Community composition in complex biofilms is governed by known ecological  
569 principles such as dispersal, selection, drift, and diversification<sup>26</sup>. In the presence of  
570 sufficient nutrients, selection within microbial communities is (at least partially) driven  
571 by the metabolic potential and growth physiology of individual members. The supply  
572 of different/new substrates to an established community allows the growth of different  
573 bacterial species based on their metabolic capabilities, resulting in a change in the  
574 community composition. For example, Eilers and colleagues<sup>27</sup> (soil communities) and  
575 Reintjes and colleagues<sup>28</sup> (marine communities) demonstrated that the addition of  
576 particular carbon substrates resulted in bacterial growth, a loss in diversity, and  
577 considerable changes in community compositions. Reintjes and colleagues<sup>28</sup> also  
578 showed that initially abundant taxa were not abundant in the grown communities  
579 anymore. Finally, Wawrik and colleagues<sup>29</sup> showed that carbon sources that differ in  
580 their complexity select for different bacterial communities, with 70 % dissimilarities

581 between communities grown on different substrates. This happened quickly, e.g., with  
582 a developing community growing on acetate being 70 % dissimilar within 18 h of  
583 incubation. The establishment of similar communities, relative to the complexity of  
584 supplied carbon substrate, indicated that metabolic capabilities (biochemical  
585 pathways) are similar amongst growing cells<sup>29</sup>. Our results mirrored many of these  
586 findings, in that richness decreased dramatically (Figure 4) and the dominating  
587 bacteria after growth on EPDM were completely different to the dominating bacteria in  
588 each original water (Figure 5). However, it is noted that even when microorganisms  
589 are capable of using the same substrates, growth physiology (i.e., growth rate and  
590 yield) allows some species to outcompete others. This so called *competitive exclusion*  
591 *principle*<sup>30</sup> was demonstrated by Friedman and colleagues<sup>31</sup> and Christensen and  
592 colleagues<sup>32</sup> who correlated the ability to outcompete others to a species' growth rate  
593 and yield. Our data (e.g., Figure 5) does not allow separation between selection  
594 caused by metabolic capabilities and growth physiology. However, this may be an  
595 explanation why some taxa dominated in the microcosms.

596

597 The arguments above explain selection during growth, but may lead to an erroneous  
598 conclusion that growth on the EPDM coupons should by default result in similar  
599 communities being selected. Here, our data clearly showed that all five original water  
600 samples resulted in completely different final communities following growth (Figure 5).  
601 This is explained by the fact that many different bacterial species can have the same  
602 carbon-degrading functions, i.e., identity does not equal functionality. In this regard,  
603 Burke and colleagues<sup>33</sup> showed that communities that are dissimilar in their  
604 taxonomical composition (e.g., 15 % similarity) can be very similar regarding their  
605 functional composition (with, e.g., 70 % similarity). Recent work by Goldford and

606 colleagues<sup>25</sup> showed that growth on additional carbon sources increased the  
607 dissimilarity between developing communities on taxonomic level, however, revealed  
608 carbon source specific analogies on family level<sup>25</sup>.

609

#### 610 **4.2 Understanding building plumbing microbiomes**

611 One very practical relevance of biofilm growth and selection discussed above is the  
612 first colonization of drinking water plumbing systems during the commissioning of new  
613 buildings. Here, a wide variety of synthetic plumbing materials<sup>34,35</sup> provides  
614 biodegradable organic carbon<sup>36,37</sup> to complex drinking water microbial  
615 communities<sup>38,39</sup>. The consequence is biofilm formation and development in the  
616 plumbing system, which ultimately affects the microbiological quality of the drinking  
617 water<sup>34,40</sup>. Observations in recent years from several pilot-scale and full-scale studies  
618 reported considerable changes in drinking water microbial communities after passage  
619 through building plumbing systems. For example, Ling and colleagues<sup>11</sup> showed that  
620 the community composition of the drinking water changes during stagnation within  
621 building plumbing systems compared to the composition within the distribution  
622 network. Work from our own group specifically compared tap water, stagnated water,  
623 and biofilm communities in shower hoses and showed distinct changes in the  
624 microbiome due to the biofilms growing in the hoses<sup>12</sup>. These findings are further  
625 supported by data from Ji and colleagues<sup>13</sup> and Dai and colleagues<sup>41</sup> showing that  
626 material, temperature, and stagnation time change the microbiology compared to the  
627 water community flowing into the rig installations, with, e.g., stagnation resulting in a  
628 diversity loss within the drinking water community<sup>41</sup>.

629

630 It is clear that building plumbing systems are per se complex environments, with  
631 multiple confounding factors (e.g., temperature, hydraulics, nutrients) affecting  
632 bacterial colonization, growth, and microbiome composition. Previous studies  
633 suggested that the choice of plumbing material plays a critical role, particularly when  
634 the material supplies nutrients for growth<sup>15,24,42</sup>. For example, Rogers and colleagues<sup>43</sup>  
635 studied biofilm development on different materials with different extents of growth  
636 supporting properties (and their ability to resist invading *Legionella*). Proctor and  
637 colleagues<sup>15</sup> studied different shower hose materials and found differences in growth  
638 community composition. Along the same lines, we demonstrated in a previous study  
639 considerable selection in biofilm communities forming within shower hoses, with  
640 differences in the microbiome measurable on small-scale<sup>14</sup>. In the present study, we  
641 show an example for EPDM, which is commonly used for drinking water  
642 applications<sup>16,24,44,45</sup> (Figures 3, 4, 5). We demonstrated selection, but also showed  
643 that selection differed based on the source water (Figure 5). While there is an obvious  
644 need and scope for larger observational studies on drinking water microbiomes<sup>46</sup>,  
645 there is also a clear need for basic laboratory-scale ecological studies that can help to  
646 inform on interpretations from complex building plumbing data. Moreover,  
647 understanding the basic ecology of building plumbing systems will provide a basis for  
648 proactive management of the microbiomes in these systems.

649

### 650 **4.3 Managing colonization of building plumbing materials**

651 Better knowledge on growth-dependent selection within biofilm communities can be  
652 used to design building plumbing systems where the microbiology is controlled or even  
653 specifically tailored to the system. Microbial colonization and growth on building  
654 plumbing materials is currently not (properly) controlled. Upon commissioning of a

655 building, all new plumbing material is exposed to complex drinking water communities  
656 during the first use. In fact, there is essentially no control over the identity and  
657 composition of bacteria that attach and proliferate in the new system, irrespective of  
658 the location, source water, disinfectant use, building type, or plumbing materials. To  
659 date, there are surprisingly few studies looking at this initial colonization of building  
660 plumbing materials, both full- and pilot-scale. A notable exception is the study by  
661 Salehi and colleagues<sup>34</sup>, where they monitored changes in water chemistry and  
662 bacterial growth during the first days/weeks of building occupation. Also, a study by  
663 Douterelo and colleagues<sup>47</sup>, showed that specific bacteria are dominant during the  
664 initial colonization (7 – 28 d) of distribution pipe materials. The fact is, in current  
665 practice the owners/operators have effectively no control over the communities that  
666 colonize their building plumbing systems.

667

668 Smart use of material properties can control microbial growth (and thus biofilm  
669 communities). For example, the use of high quality materials and the avoidance of low  
670 quality ones (e.g., flexible hoses) reduces the potential of bacteria to actually grow.  
671 For this, standards for material quality requirements have already been implemented  
672 in Europe (e.g.,<sup>48</sup>) and official tests on carbon migration and corresponding growth  
673 potentials have been established (e.g.,<sup>17,49</sup>) (e.g., Figure 2). Using such tests to qualify  
674 the use of individual materials in new buildings should be a must for the industry. A  
675 more expensive but sensible approach is to use materials that do not leach any carbon  
676 (e.g., stainless steel plumbing). For example, Van der Kooij and colleagues<sup>50</sup> showed  
677 that biofilm growth and the incorporation of *Legionella* spp. was less on stainless steel  
678 compared to polymeric PE-X pipes. It is, however, important to take into account that  
679 high quality polymeric materials can perform as good as metal piping with regard to



680 microbial growth (see, e.g., <sup>51</sup>). As another possibility, some studies suggested  
681 developing and using plumbing materials with anti-microbial properties for minimizing  
682 microbial growth and the proliferation of pathogens. For example, Saleh and  
683 colleagues<sup>52</sup> showed that a coating containing copper and silver ions resulted in less  
684 bacterial attachment and biofilm growth when exposing a *Pseudomonas aeruginosa*  
685 isolate ( $10^5 - 10^6$  CFU/mL) to coated glass slides for 2 h, shaking.

686

687 An alternative approach could be to embrace the microbiology of building plumbing  
688 systems instead of resisting it. Carbon migration from building plumbing materials can  
689 theoretically be used to select and maintain preferred communities. Wang and  
690 colleagues<sup>53</sup> provocatively suggested that systems may be redesigned in a  
691 pre/probiotic approach to favor certain communities of choice. One way to approach  
692 this addresses the concept of niche occupation, which is especially important during  
693 the colonization of new surfaces, e.g., during the commissioning of a new building.  
694 Niche occupation can result in the exclusion of species due to a more efficient spatial  
695 expansion of a competitor or due to better growth physiologies<sup>54</sup>. For the first, Schluter  
696 and colleagues<sup>55</sup> emphasized the importance of adhesion during initial attachment for  
697 the *evolutionary fate of microbes in biofilms*. For the second, Freilich and colleagues<sup>56</sup>  
698 defined the competition for identical nutrient sources as a *win-lose relationship*, which  
699 will ultimately allow organisms with better growth yields/rates to outcompete others.  
700 This pre/probiotic approach can be taken a step further by introducing, selecting, and  
701 maintaining specific antagonistic bacteria that challenge unwanted organisms. For  
702 example, several studies showed that a range of aquatic isolates, especially  
703 *Pseudomonas* spp., produce *bacteriocin-like substances* that have an antagonistic

704 effect on the establishment of *Legionella* spp. in biofilms<sup>57-59</sup>, which can potentially be  
705 exploited as probiotic communities against *Legionella pneumophila*.

706

707 Here we propose a combination of the approaches above. We argue for the use of  
708 plumbing materials that provide specific substrates and for the targeted colonization  
709 of these materials of a benign microbial community. The approach foresees the use  
710 of materials that migrate organic carbon in such a quality and quantity that it allows  
711 bacteria to grow and to sustain their existence in the developing biofilm. We  
712 furthermore propose colonizing these materials with bacteria from a safe source (e.g.,  
713 bottled water), pre-selected on the substances migrating from the material (e.g.,  
714 Figure 5). This adaption to the nutrients ultimately allows for a rapid colonization (e.g.,  
715 Figure 6), growth and long term persistence. A further expansion of the approach could  
716 be the use of purposefully designed synthetic communities that specifically include  
717 antagonists to specific building plumbing pathogens<sup>57-59</sup>. Combining both niche  
718 occupancy capabilities and powerful antagonistic functions within a pre-  
719 conditioned/pre-selected community is an unconventional but exciting approach  
720 towards the future management of biofilm formation on polymeric materials in contact  
721 with drinking water.

722

723

724

725

726

727

728

729 **5. Conclusions**

730

731 • The use of a flexible polymeric plumbing material (here EPDM) increased the  
732 biodegradable organic carbon concentration of drinking water, which resulted in  
733 substantial growth for bacterial communities of different origin.

734 • The migrating carbon drove nutrient-based selection within the original drinking  
735 water communities, which resulted in (1) a dramatic decrease in taxa richness and  
736 diversity, (2) compositional changes in communities, and (3) an increase in  
737 similarity amongst growing biofilm communities, i.e., similarities in abundant taxa.

738 • Selected biofilm bacteria showed better attachment performances to new material  
739 surfaces, with more attachment and higher attachment rates.

740 • This work is a step towards pro-active managing of building plumbing biofilms  
741 through nutrient-based selection of specific communities of choice.

742

743

744 **Acknowledgements**

745

746 The authors thank Silvia Kobel and Aria Minder-Pfyl for support and protocols for  
747 library preparation and sequencing, Jean-Claude Walser for support with data  
748 processing, and Caitlin Proctor for preliminary discussions on the topic.

749

750

751

752

753

754 **Funding**

755

756 This work was funded by the Swiss National Science Foundation (SNSF grant nr.

757 31003A\_163366/1).

758

759 **Author contributions**

760 LN: experimental design, experimental work, data analysis, and manuscript writing.

761 LC: experimental design, experimental work, and data analysis.

762 FH: experimental design and manuscript writing.

763 **References**

- 764 1. Gaylarde, C., Ribas Silva, M. & Warscheid, T. Microbial impact on building  
765 materials: an overview. *Mater. Struct.* **36**, 342–352 (2003).
- 766 2. Williams, M. M., Armbruster, C. R. & Arduino, M. J. Plumbing of hospital  
767 premises is a reservoir for opportunistically pathogenic microorganisms: a  
768 review. *Biofouling* **29**, 147–62 (2013).
- 769 3. Ji, P., Rhoads, W. J., Edwards, M. A. & Pruden, A. Impact of water heater  
770 temperature setting and water use frequency on the building plumbing  
771 microbiome. *ISME J.* 1–13 (2017). doi:10.1038/ismej.2017.14
- 772 4. Henne, K., Kahlisch, L., Ho, M. G. & Brettar, I. Seasonal dynamics of bacterial  
773 community structure and composition in cold and hot drinking water derived  
774 from surface water reservoirs. *Water Res.* **47**, 5614–5630 (2013).
- 775 5. Brazos, B. J., O’Conner, J. T. & Abcouwer, S. Kinetics of Chlorine Depletion  
776 and Microbial Growth. (1985).
- 777 6. Kim, J. *et al.* Hydrodynamic effects on bacterial biofilm development in a  
778 microfluidic environment. *RSC Publ.* **13**, 1846–1849 (2013).
- 779 7. Fish, K., Osborn, A. M. & Boxall, J. B. Biofilm structures (EPS and bacterial  
780 communities) in drinking water distribution systems are conditioned by  
781 hydraulics and influence discolouration. *Sci. Total Environ.* **593–594**, 571–580  
782 (2017).
- 783 8. WHO. *Standards for materials used in plumbing systems.* (2011).
- 784 9. Holsen, T. M., Park, J. K., Jenkins, D. & Selleck, R. E. Contamination of  
785 potable water by permeation of plastic pipe. *Am. Water Work. Assoc.* **83**, 53–  
786 56 (1991).
- 787 10. Zhang, L. & Liu, S. Investigation of organic compounds migration from

- 788 polymeric pipes into drinking water under long retention times. *Procedia Eng.*  
789 **70**, 1753–1761 (2014).
- 790 11. Ling, F., Whitaker, R., LeChevallier, M. W. & Liu, W.-T. Drinking water  
791 microbiome assembly induced by water stagnation. *ISME J.* **12**, 1520–1531  
792 (2018).
- 793 12. Proctor, C. R., Reimann, M., Vriens, B. & Hammes, F. Biofilms in shower  
794 hoses. *Water Res.* **131**, 274–286 (2018).
- 795 13. Ji, P., Parks, J., Edwards, M. A. & Pruden, A. Impact of Water Chemistry, Pipe  
796 Material and Stagnation on the Building Plumbing Microbiome. *PLoS One* **10**,  
797 e0141087 (2015).
- 798 14. Neu, L., Proctor, C. R., Walser, J.-C. & Hammes, F. Small-scale heterogeneity  
799 in drinking water biofilms. *Front. Microbiol.* **10**, 1–14 (2019).
- 800 15. Proctor, C. R. *et al.* Biofilms in shower hoses - choice of pipe material  
801 influences bacterial growth and communities. *Environ. Sci. Water Res.*  
802 *Technol.* **2**, 670–682 (2016).
- 803 16. Moritz, M. M., Flemming, H. C. & Wingender, J. Integration of *Pseudomonas*  
804 *aeruginosa* and *Legionella pneumophila* in drinking water biofilms grown on  
805 domestic plumbing materials. *Int. J. Hyg. Environ. Health* **213**, 190–197  
806 (2010).
- 807 17. Koetzsch, S. & Egli, T. Kunststoffe in Kontakt mit Trinkwasser. *Aqua & Gas* **3**,  
808 44–52 (2016).
- 809 18. Wen, G., Koetzsch, S., Vital, M., Egli, T. & Ma, J. BioMig - A Method to  
810 Evaluate the Potential Release of Compounds from and the Formation of  
811 Biofilms on Polymeric Materials in Contact with Drinking Water. *Environ. Sci.*  
812 *Technol.* **49**, 11659–11669 (2015).

- 813 19. Prest, E. I., Hammes, F., Köttsch, S., van Loosdrecht, M. C. M. &  
814 Vrouwenvelder, J. S. Monitoring microbiological changes in drinking water  
815 systems using a fast and reproducible flow cytometric method. *Water Res.* **47**,  
816 7131–7142 (2013).
- 817 20. Klindworth, A. *et al.* Evaluation of general 16S ribosomal RNA gene PCR  
818 primers for classical and next-generation sequencing-based diversity studies.  
819 *Nucleic Acids Res.* **41**, 1–11 (2013).
- 820 21. Edgar, R. C. Accuracy of microbial community diversity estimated by closed-  
821 and open- reference OTUs. *PeerJ* 1–17 (2017). doi:10.7717/peerj.3889
- 822 22. Neu, L. *et al.* Ugly ducklings - The dark side of plastic materials in contact with  
823 potable water. *npj Biofilms Microbiomes* **4**, (2018).
- 824 23. Mao, G., Wang, Y. & Hammes, F. Short-term organic carbon migration from  
825 polymeric materials in contact with chlorinated drinking water. *Sci. Total*  
826 *Environ.* **613–614**, 1220–1227 (2018).
- 827 24. Park, J. W. *et al.* Evaluation of organic migration and biomass formation on  
828 polymeric components in a point-of-use water dispenser. *Water Res.* **165**,  
829 (2019).
- 830 25. Goldford, J. E. *et al.* Emergent simplicity in microbial community assembly.  
831 *Science (80-. )*. **361**, 469–474 (2018).
- 832 26. Kinnunen, M. *et al.* A conceptual framework for invasion in microbial  
833 communities. *ISME J.* **10**, 2773–2775 (2016).
- 834 27. Eilers, K. G., Lauber, C. L., Knight, R. & Fierer, N. Shifts in bacterial  
835 community structure associated with inputs of low molecular weight carbon  
836 compounds to soil. *Soil Biol. Biochem.* **42**, 896–903 (2010).
- 837 28. Reintjes, G., Arnosti, C., Fuchs, B. & Amann, R. Selfish, sharing and

- 838 scavenging bacteria in the Atlantic Ocean: a biogeographical study of bacterial  
839 substrate utilisation. *ISME J.* **13**, 1119–1132 (2019).
- 840 29. Wawrik, B., Kerkhof, L., Kukor, J. & Zylstra, G. Effect of different carbon  
841 sources on community composition of bacterial enrichments from soil. *Appl.*  
842 *Environ. Microbiol.* **71**, 6776–6783 (2005).
- 843 30. Hardin, G. The Competitive Exclusion Principle Published by : American  
844 Association for the Advancement of Science Linked references are available  
845 on JSTOR for this article : The Competitive Exclusion Principle. *Science*  
846 (80- ). **131**, 1292–1297 (1960).
- 847 31. Friedman, J., Higgins, L. M. & Gore, J. Community structure follows simple  
848 assembly rules in microbial microcosms. *Nat. Ecol. Evol.* **1**, 1–7 (2017).
- 849 32. Christensen, B. B., Haagensen, J. A. J., Heydorn, A. & Molin, S. Metabolic  
850 commensalism and competition in a two-species microbial consortium. *Appl.*  
851 *Environ. Microbiol.* **68**, 2495–2502 (2002).
- 852 33. Burke, C., Steinberg, P., Rusch, D., Kjelleberg, S. & Thomas, T. Bacterial  
853 community assembly based on functional genes rather than species. *Proc.*  
854 *Natl. Acad. Sci. U. S. A.* **108**, 14288–14293 (2011).
- 855 34. Salehi, M. *et al.* Case study: Fixture water use and drinking water quality in a  
856 new residential green building. *Chemosphere* **195**, 80–89 (2018).
- 857 35. Koetzsch, S. & Egli, T. Kunststoffe in Kontakt mit Trinkwasser. *Aqua & Gas* **3**,  
858 (2013).
- 859 36. Schoenen, D. & Schöler, H. Microbial alterations of drinking water by building  
860 materials - field observations and laboratory studies. *Am. Water Work. Assoc.*  
861 307–317 (1985).
- 862 37. Connell, M. *et al.* PEX and PP water pipes: Assimilable carbon, chemicals, and



- 863 odors. *J. Am. Water Works Assoc.* **108**, E192–E204 (2016).
- 864 38. Ma, X., Vikram, A., Casson, L. & Bibby, K. Centralized Drinking Water  
865 Treatment Operations Shape Bacterial and Fungal Community Structure.  
866 *Environ. Sci. Technol.* **51**, 7648–7657 (2017).
- 867 39. Henne, K., Kahlisch, L., Brettar, I. & Höfle, M. G. Analysis of structure and  
868 composition of bacterial core communities in mature drinking water biofilms  
869 and bulk water of a citywide network in Germany. *Appl. Environ. Microbiol.* **78**,  
870 3530–3538 (2012).
- 871 40. Inkinen, J. *et al.* Drinking water quality and formation of biofilms in an office  
872 building during its first year of operation, a full scale study. *Water Res.* **48**, 83–  
873 91 (2014).
- 874 41. Dai, D., Rhoads, W. J., Edwards, M. A. & Pruden, A. Shotgun Metagenomics  
875 Reveals Taxonomic and Functional Shifts in Hot water microbiome due to  
876 temperature setting and stagnation. *Front. Microbiol.* **9**, 1–17 (2018).
- 877 42. Rogers, J., Dowsett, A. B., Dennis, P. J., Lee, J. V. & Keevil, C. W. Influence of  
878 plumbing materials on biofilm formation and growth of *Legionella pneumophila*  
879 in potable water systems. *Appl. Environ. Microbiol.* **60**, 1842–1851 (1994).
- 880 43. Rogers, J., Dowsett, A. B., Dennis, P. J., Lee, J. V. & Keevil, C. W. Influence of  
881 plumbing materials on biofilm formation and growth of *Legionella pneumophila*  
882 in potable water systems. *Appl. Environ. Microbiol.* **60**, 1842–1851 (1994).
- 883 44. Kilb, B., Lange, B., Schaule, G., Flemming, H. C. & Wingender, J.  
884 Contamination of drinking water by coliforms from biofilms grown on rubber-  
885 coated valves. *Int. J. Hyg. Environ. Health* **206**, 563–573 (2003).
- 886 45. Meier, T. & Bendinger, B. Survival of pathogens in drinking water plumbing  
887 systems: impact factors and sanitation options. *Water Sci. Technol. Water*

- 888            *Supply* **16**, 931–941 (2016).
- 889    46.    Hull, N. M. *et al.* Drinking Water Microbiome Project: Is it Time? *Trends*  
890            *Microbiol.* **27**, 670–677 (2019).
- 891    47.    Douterelo, I., Sharpe, R. & Boxall, J. Bacterial community dynamics during the  
892            early stages of biofilm formation in a chlorinated experimental drinking water  
893            distribution system: Implications for drinking water discolouration. *J. Appl.*  
894            *Microbiol.* **117**, 286–301 (2014).
- 895    48.    EN16421, D. *Influence of Materials on Water for Human Consumption*  
896            *Enhancement of Microbial Growth (EMG)*. (2014). doi:SS-EN 16421:2014
- 897    49.    Bundesamt, U. *Leitlinie zur hygienischen Beurteilung von organischen*  
898            *Materialien im Kontakt mit Trinkwasser*. (2016).
- 899    50.    Van Der Kooij, D., Veenendaal, H. R. & Scheffer, W. J. H. Biofilm formation  
900            and multiplication of *Legionella* in a model warm water system with pipes of  
901            copper, stainless steel and cross-linked polyethylene. *Water Res.* **39**, 2789–  
902            2798 (2005).
- 903    51.    Lehtola, M. J. *et al.* Microbiology, chemistry and biofilm development in a pilot  
904            drinking water distribution system with copper and plastic pipes. *Water Res.*  
905            **38**, 3769–3779 (2004).
- 906    52.    Saleh, S., Sweileh, B., Taha, S. O., Mahmoud, R. & Taha, M. O. Preparation of  
907            polyester-based metal-cross linked polymeric composites as novel materials  
908            resistant to bacterial adhesion and biofilm formation. *Molecules* **16**, 933–950  
909            (2011).
- 910    53.    Wang, H., Edwards, M. A., Falkinham 3rd, J. O. & Pruden, A. Probiotic  
911            approach to pathogen control in premise plumbing systems? A review. *Env.*  
912            *Sci Technol* **47**, 10117–10128 (2013).

- 913 54. Lloyd, D. P. & Allen, R. J. Competition for space during bacterial colonization  
914 of a surface. *J. R. Soc. Interface* **12**, (2015).
- 915 55. Schluter, J., Nadell, C. D., Bassler, B. L. & Foster, K. R. Adhesion as a  
916 weapon in microbial competition. *ISME J.* **9**, 139–149 (2015).
- 917 56. Freilich, S. *et al.* Competitive and cooperative metabolic interactions in  
918 bacterial communities. *Nat. Commun.* **2**, (2011).
- 919 57. Corre, M. H., Delafont, V., Legrand, A., Berjeaud, J. M. & Verdon, J. Exploiting  
920 the richness of environmental waterborne bacterial species to find natural  
921 legionella pneumophila competitors. *Front. Microbiol.* **10**, 1–11 (2019).
- 922 58. Héchar, Y., Ferraz, S., Bruneteau, E., Steinert, M. & Berjeaud, J. M. Isolation  
923 and characterization of a *Staphylococcus warneri* strain producing an anti-  
924 Legionella peptide. *FEMS Microbiol. Lett.* **252**, 19–23 (2005).
- 925 59. Guerrieri, E. *et al.* Effect of bacterial interference on biofilm development by  
926 Legionella pneumophila. *Curr. Microbiol.* **57**, 532–536 (2008).
- 927
